# Supplementary material for: Time gap between the onset and diagnosis in Werner syndrome: a nationwide survey and the 2020 registry in Japan
Source: publisher site journal article supplement (doi:10.18632/aging.202441), 2020-12-29
Supplement: Supplementary file [file aging-v12i24-202441-supplementary-material-SD1.pdf]

## SUPPLEMENTARY FIGURE

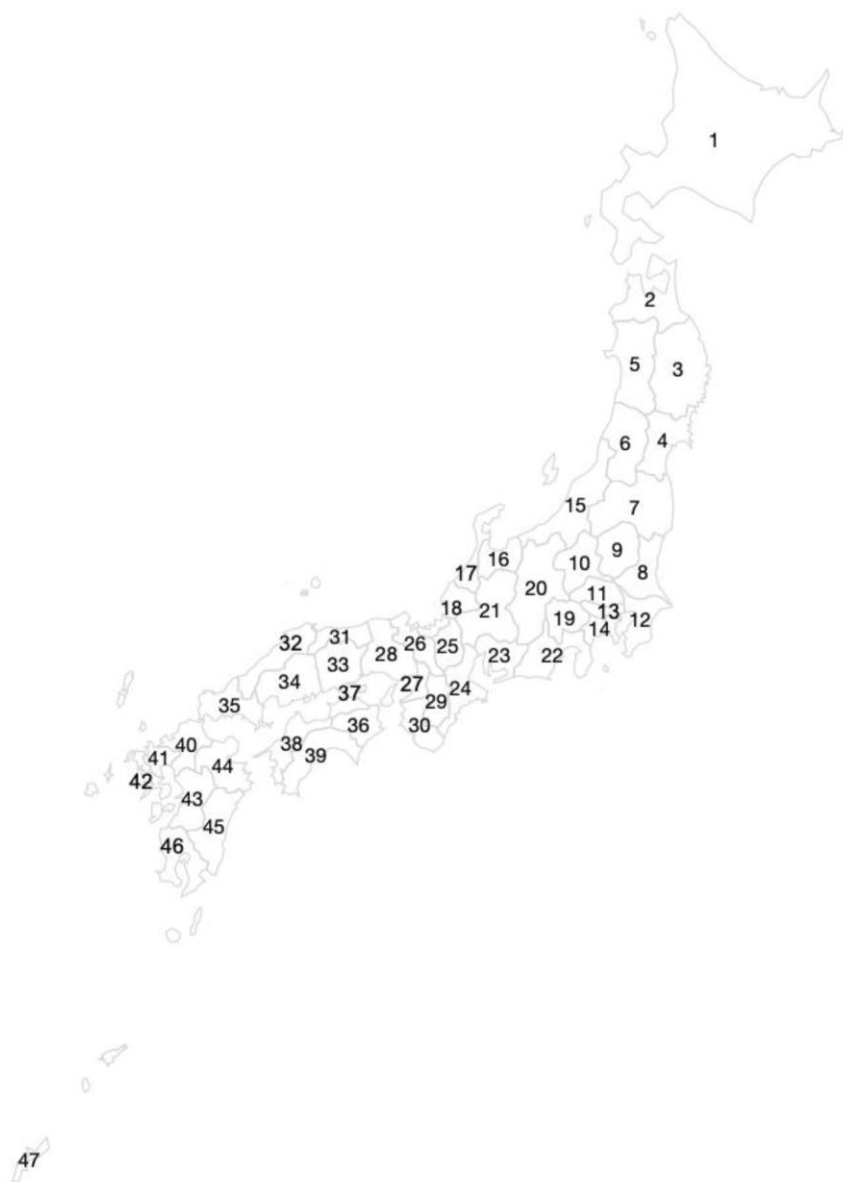

**Supplementary Figure 1. Number of patients with Werner syndrome in each region in Japan.** Number on map indicates in Supplementary Table 2.
