# Supplementary material for: Time gap between the onset and diagnosis in Werner syndrome: a nationwide survey and the 2020 registry in Japan
Source: Aging (Albany NY). 2020 Dec 29;12(24):24940–56. doi: 10.18632/aging.202441 (PMC7803551; doi:10.18632/aging.202441)
Supplement: Supplementary Tables [file aging-12-202441-s002.pdf]

## SUPPLEMENTARY TABLES

**Supplementary Table 1. Breakdown of patients with Werner syndrome and suspected cases.**

|                                                                          | Total | Male | Female |
|--------------------------------------------------------------------------|-------|------|--------|
| Patients with Werner syndrome at the hospitals at the time of the survey | 116   | 57   | 59     |
| Patients suspected of having Werner syndrome                             | 51    | 29   | 22     |
| Patients with Werner syndrome visited the hospital in the past 10 years  | 153   | 80   | 71     |
| (The sexes of two patients were unknown)                                 |       |      |        |
| Total                                                                    | 320   | 166  | 152    |

Reported patients includes 116 diagnosed patients who were attending the hospital for treatment during the survey, 51 patients suspected of having Werner syndrome, and 153 patients visited the hospital in the past 10 years although not having attended the hospitals during the survey. In total, 320 patients with Werner syndrome or suspected cases were reported.

**Supplementary Table 2. Number of patients with Werner syndrome in each region in Japan.**

| Region    | Number on map | Diagnosed cases | Suspected cases | Past confirmed cases | Combination | Diagnosed cases / million | Combination / million | Population (million) |
|-----------|---------------|-----------------|-----------------|----------------------|-------------|---------------------------|-----------------------|----------------------|
| Nagasaki  | 42            | 8               | 0               | 8                    | 16          | 5.9                       | 11.8                  | 1.35                 |
| Tokushima | 36            | 4               | 1               | 2                    | 7           | 5.4                       | 9.4                   | 0.74                 |
| Akita     | 5             | 5               | 0               | 0                    | 5           | 5.0                       | 5.0                   | 1.00                 |
| Saga      | 41            | 3               | 0               | 2                    | 5           | 3.6                       | 6.1                   | 0.82                 |
| Kyoto     | 26            | 7               | 1               | 7                    | 15          | 2.7                       | 5.8                   | 2.60                 |
| Okayama   | 33            | 5               | 2               | 4                    | 11          | 2.6                       | 5.8                   | 1.91                 |
| Oita      | 44            | 3               | 1               | 2                    | 6           | 2.6                       | 5.2                   | 1.15                 |
| Yamanashi | 19            | 2               | 1               | 1                    | 4           | 2.4                       | 4.9                   | 0.82                 |
| Nara      | 29            | 3               | 0               | 1                    | 4           | 2.2                       | 3.0                   | 1.35                 |
| Ibaraki   | 8             | 4               | 2               | 5                    | 11          | 1.4                       | 3.8                   | 2.89                 |
| Niigata   | 15            | 3               | 0               | 0                    | 3           | 1.3                       | 1.3                   | 2.27                 |
| Miyagi    | 4             | 3               | 3               | 2                    | 8           | 1.3                       | 3.4                   | 2.32                 |
| Fukui     | 18            | 1               | 1               | 1                    | 3           | 1.3                       | 3.9                   | 0.78                 |
| Osaka     | 27            | 10              | 3               | 14                   | 27          | 1.1                       | 3.1                   | 8.82                 |
| Kumamoto  | 43            | 2               | 3               | 2                    | 7           | 1.1                       | 4.0                   | 1.77                 |
| Mie       | 24            | 2               | 1               | 1                    | 4           | 1.1                       | 2.2                   | 1.80                 |
| Hyogo     | 28            | 6               | 0               | 4                    | 10          | 1.1                       | 1.8                   | 5.50                 |
| Aichi     | 23            | 8               | 5               | 3                    | 16          | 1.1                       | 2.1                   | 7.53                 |
| Gunma     | 10            | 2               | 1               | 6                    | 9           | 1.0                       | 4.6                   | 1.96                 |
| Toyama    | 16            | 1               | 1               | 0                    | 2           | 0.9                       | 1.9                   | 1.06                 |
| Miyazaki  | 45            | 1               | 0               | 2                    | 3           | 0.9                       | 2.8                   | 1.09                 |
| Ishikawa  | 17            | 1               | 1               | 5                    | 7           | 0.9                       | 6.1                   | 1.15                 |
| Shizuoka  | 22            | 3               | 1               | 1                    | 5           | 0.8                       | 1.4                   | 3.68                 |
| Iwate     | 3             | 1               | 1               | 1                    | 3           | 0.8                       | 2.4                   | 1.26                 |
| Ehime     | 38            | 1               | 0               | 1                    | 2           | 0.7                       | 1.5                   | 1.36                 |
| Hokkaido  | 1             | 3               | 1               | 6                    | 10          | 0.6                       | 1.9                   | 5.32                 |
| Gifu      | 21            | 1               | 0               | 1                    | 2           | 0.5                       | 1.0                   | 2.01                 |
| Nagano    | 20            | 1               | 2               | 4                    | 7           | 0.5                       | 3.4                   | 2.08                 |
| Chiba     | 12            | 3               | 1               | 2                    | 6           | 0.5                       | 1.0                   | 6.25                 |
| Tokyo     | 13            | 5               | 6               | 11                   | 22          | 0.4                       | 1.6                   | 13.72                |

|           |    |   |   |   |    |     |     |      |
|-----------|----|---|---|---|----|-----|-----|------|
| Hiroshima | 34 | 1 | 0 | 4 | 5  | 0.4 | 1.8 | 2.83 |
| Fukuoka   | 40 | 1 | 3 | 8 | 12 | 0.2 | 2.3 | 5.11 |
| Kanagawa  | 14 | 1 | 1 | 6 | 8  | 0.1 | 0.9 | 9.16 |
| Okinawa   | 47 | 0 | 1 | 0 | 1  | 0   | 0.7 | 1.44 |
| Saitama   | 11 | 0 | 1 | 2 | 3  | 0   | 0.4 | 7.31 |
| Yamagata  | 6  | 0 | 1 | 2 | 3  | 0   | 2.7 | 1.10 |
| Yamaguchi | 35 | 0 | 2 | 1 | 3  | 0   | 2.2 | 1.38 |
| Shiga     | 25 | 0 | 0 | 1 | 1  | 0   | 0.7 | 1.41 |
| Kagoshima | 46 | 0 | 0 | 2 | 2  | 0   | 1.2 | 1.63 |
| Aomori    | 2  | 0 | 1 | 2 | 3  | 0   | 2.3 | 1.28 |
| Tottori   | 31 | 0 | 0 | 1 | 1  | 0   | 1.8 | 0.57 |
| Shimane   | 32 | 0 | 0 | 1 | 1  | 0   | 1.5 | 0.69 |
| Tochigi   | 9  | 0 | 2 | 3 | 5  | 0   | 2.6 | 1.96 |
| Fukushima | 7  | 0 | 0 | 3 | 3  | 0   | 1.6 | 1.88 |

Number on map indicates in Supplementary Figure 1.
